# Supplementary material for: In situanalysis of liposome hard and soft protein corona structure and composition in a single label-free workflow
Source: Royal Society of Chemistry journal article supplement (doi:10.1039/c9nr08186k), 2019-12-18
Supplement: c9nr08186k2.xlsx [file c9nr08186k2.xlsx]

## Sheet: Average
SC	lp (nm)	Γ_lipid	Γ_protein		M	protein/lipid (%)
F1-1	2.79492	1906	790.43		65.565	0.506011
F1-2	3.67328	1668.15	920.098		63.776	0.691883
F1-3	5.66588	1098.79	979.142		65.047	1.09596
	4.04469	1557.64	896.557			0.764618
	0.849327	239.481	55.7336			0.174143
F2-1	9.67698	386.781	753.194		64.964	2.39806
F2-2	12.8387	295.29	906.479		65.972	3.72255
F2-3	8.14726	343.583	533.821		65.395	1.90068
	10.221	341.884	731.165			2.67376
	1.38136	26.4248	108.14			0.543693
F3-1	18.5419	159.781	842.437		66.394	6.35293
F3-2	16.1639	223.187	841.82		65.733	4.59048
F3-3	19.764	216.946	845.869		66.584	4.68458
	18.1566	199.971	843.375			5.20933
	1.05697	20.1758	1.25934			0.572445
HC
F1-1	0.338857	1906	90.3921		72.522	0.0523153
F1-2	0.486158	1668.15	113.757		78.521	0.0694782
F1-3	1.9805	1098.79	315.255		77.917	0.294582
	0.935173	1557.64	173.135			0.138792
	0.524392	239.481	71.3796			0.0780525
F2-1	3.29952	386.781	198.744		74.212	0.553919
F2-2	3.17679	295.29	145.988		82.656	0.478502
F2-3	3.04351	343.583	161.987		78.345	0.481424
	3.17327	341.884	168.906			0.504615
	0.0739257	26.4248	15.6176			0.0246665
F3-1	7.69125	159.781	219.112		76.998	1.42479
F3-2	2.76033	223.187	92.2563		75.152	0.440025
F3-3	2.5728	216.946	80.8065		74.947	0.397585
	4.34146	199.971	130.725			0.754135
	1.67577	20.1758	44.317			0.335554

## Sheet: Molecular weight
DPPC	0.75	734.039	206.34
DSPC	0.15	790.145	224.81		1,2-dioctadecanoyl-sn-glycero-3-phosphocholine
Lyso-PC	0.1	495.638
DSPE-PEG	0.04	2790.49
	830.234		215.575
			0.259656

## Sheet: Control
Protein dndC	0.185					S1	134.6
Protein density	1.35					d1	110.67
Protein RI	1.57975					S2	112.4
Thickness	7.73					d2	170.37
Response	1.9					α	0.54
Mass	874.27
Response of full coverage
2.0963
Mass of full coverage
1939.28

## Sheet: Control (2)
Protein dndC	0.185					S1	134.6
Protein density	1.35					d1	110.67
Protein RI	1.57975					S2	112.4
Thickness	7.73					d2	170.37
Response	0.5					α	0.54
Mass	230.071
Mass 2	199.998
Response of full coverage
2.0963
Mass of full coverage
1939.28

## Sheet: F1-1
	1	2				S1	134.6
Peak angle minimum of sensor	69.48	66.02				d1	110.67
Bulk refractive index (buffer)	1.33034	1.32817				S2	112.4
Liposome thickness	86.2					d2	170.37
Liposome RI	1.35951	1.3626	0.847226	(dndC)		α	0.54
Liposome Response	2.2017	1.6411	1.3416	(ratio)		d (lipid)	5
Liposome intensity corrected	2.174	1.577	1.37857
Lipsome thickness from ratio	88.5
Plasma Response	4.1684	2.8166
Plasma Response TIR corrected	3.396	2.057	1.65095
Plasma thickness from ratio	89.3
Δ Plasma Response	1.222	0.48
After Response	2.3428	1.4129	1.65815
Δ After Response	0.1411	-0.2282
After thickness from ratio	92.8
Mass of liposomes	1906	ng/cm2
SC
Mass of protein	790.43	ng/cm2
Effective thickness	2.79492	nm
Molecular mass of protein	65.566	kDa
Ratio of protein per lipid	0.00504736
Radius of protein	2.68023
HC
Mass of protein	90.3921	ng/cm2
Effective thickness	0.338857	nm
Molecular mass of protein	72.522	kDa
Ratio of protein per lipid	0.000523134
Radius of protein	2.77185

## Sheet: F1-2
	1	2				S1	134.6
Peak angle minimum of sensor	69.78	66.21				d1	110.67
Bulk refractive index (buffer)	1.33038	1.32839				S2	112.4
Liposome thickness	96.32					d2	170.37
Liposome RI	1.35377	1.35414	0.90835	(dndC)		α	0.54
Liposome Response	1.8279	1.3243	1.38028	(ratio)		d (lipid)	5
Liposome intensity corrected	1.829	1.257	1.45505
Lipsome thickness from ratio	101.4
Plasma Response	3.8565	2.6465
Plasma Response TIR corrected	3.192	1.956	1.6319
Plasma thickness from ratio	102.4
Δ Plasma Response	1.363	0.699
After Response	1.9985	1.2188	1.63973
Δ After Response	0.1706	-0.1055
After thickness from ratio	98.5
Mass of liposomes	1668.15	ng/cm2
SC
Mass of protein	920.098	ng/cm2
Effective thickness	3.67328	nm
Molecular mass of protein	63.776	kDa
Ratio of protein per lipid	0.00689546
Radius of protein	2.65561
HC
Mass of protein	113.757	ng/cm2
Effective thickness	0.486158	nm
Molecular mass of protein	78.521	kDa
Ratio of protein per lipid	0.000694741
Radius of protein	2.84626

## Sheet: F1-3
	1	2				S1	134.6
Peak angle minimum of sensor	70.46	66.72				d1	110.67
Bulk refractive index (buffer)	1.33056	1.32855				S2	112.4
Liposome thickness	94.77					d2	170.37
Liposome RI	1.34497	1.34612	0.820148	(dndC)		α	0.54
Liposome Response	1.21661	1.02843	1.18299	(ratio)		d (lipid)	5
Liposome intensity corrected	1.212	0.887	1.3664
Lipsome thickness from ratio	70
Plasma Response	3.8565	2.6465
Plasma Response TIR corrected	2.66	1.682	1.58145
Plasma thickness from ratio	130
Δ Plasma Response	1.448	0.795
After Response	1.6895	1.0986	1.53787
Δ After Response	0.472886	0.070173
After thickness from ratio	156.9
Mass of liposomes	1098.79	ng/cm2	0.576491
SC
Mass of protein	979.142	ng/cm2
Effective thickness	5.66588	nm
Molecular mass of protein	65.047	kDa
Ratio of protein per lipid	0.0108676
Radius of protein	2.67314
HC
Mass of protein	315.255	ng/cm2
Effective thickness	1.9805	nm
Molecular mass of protein	77.917	kDa
Ratio of protein per lipid	0.00294284
Radius of protein	2.83894

## Sheet: F2-1
	1	2				S1	134.6
Peak angle minimum of sensor	69.79	66.27				d1	110.67
Bulk refractive index (buffer)	1.33102	1.32887				S2	112.4
Liposome thickness	60.11					d2	170.37
Liposome RI	1.34007	1.34128	0.729251	(dndC)		α	0.54
Liposome Response	0.495	0.4409	1.1227	(ratio)		d (lipid)	5
Liposome intensity corrected	0.49	0.4	1.225
Lipsome thickness from ratio	63.8
Plasma Response	2.6298	1.8941
Plasma Response TIR corrected	1.747	1.027	1.70107
Plasma thickness from ratio	69.2
Δ Plasma Response	1.257	0.627
After Response	0.8354	0.4894	1.70699
Δ After Response	0.3404	0.0485
After thickness from ratio	66.6
Mass of liposomes	386.781	ng/cm2
SC
Mass of protein	753.194	ng/cm2
Effective thickness	9.67698	nm
Molecular mass of protein	64.964	kDa
Ratio of protein per lipid	0.0223039
Radius of protein	2.672
HC
Mass of protein	198.744	ng/cm2
Effective thickness	3.29952	nm
Molecular mass of protein	74.212	kDa
Ratio of protein per lipid	0.00549604
Radius of protein	2.79321

## Sheet: F2-2
	1	2				S1	134.6
Peak angle minimum of sensor	70.55	66.74				d1	110.67
Bulk refractive index (buffer)	1.33113	1.32889				S2	112.4
Liposome thickness	58.23					d2	170.37
Liposome RI	1.33797	1.33965	0.635688	(dndC)		α	0.54
Liposome Response	0.3644	0.384	0.948958	(ratio)		d (lipid)	5
Liposome intensity corrected	0.377	0.37	1.01892
Lipsome thickness from ratio	100.9
Plasma Response	2.2309	1.6891
Plasma Response TIR corrected	1.882	1.249	1.50681
Plasma thickness from ratio	172.8
Δ Plasma Response	1.505	0.879
After Response	0.6165	0.399	1.54511
Δ After Response	0.2521	0.015
After thickness from ratio	152.2
Mass of liposomes	295.29	ng/cm2
SC
Mass of protein	906.479	ng/cm2
Effective thickness	12.8387	nm
Molecular mass of protein	65.972	kDa
Ratio of protein per lipid	0.0322021
Radius of protein	2.68575
HC
Mass of protein	145.988	ng/cm2
Effective thickness	3.17679	nm
Molecular mass of protein	82.656	kDa
Ratio of protein per lipid	0.004748
Radius of protein	2.89537

## Sheet: F2-3
	1	2				S1	134.6
Peak angle minimum of sensor	70.29	66.56				d1	110.67
Bulk refractive index (buffer)	1.33106	1.32891				S2	112.4
Liposome thickness	58.04					d2	170.37
Liposome RI	1.33866	1.34068	0.645709	(dndC)		α	0.54
Liposome Response	0.4285	0.42846	1.00009	(ratio)		d (lipid)	5
Liposome intensity corrected	0.439	0.391	1.12276
Lipsome thickness from ratio	38.9
Plasma Response	2.3054	1.735
Plasma Response TIR corrected	1.343	0.821	1.63581
Plasma thickness from ratio	100.3
Δ Plasma Response	0.904	0.43
After Response	0.7086	0.451	1.57118
Δ After Response	0.2801	0.02254
After thickness from ratio	136.1
Mass of liposomes	343.583	ng/cm2
SC
Mass of protein	533.821	ng/cm2
Effective thickness	8.14726	nm
Molecular mass of protein	65.395	kDa
Ratio of protein per lipid	0.0179978
Radius of protein	2.6779
HC
Mass of protein	161.987	ng/cm2
Effective thickness	3.04351	nm
Molecular mass of protein	78.345	kDa
Ratio of protein per lipid	0.00477985
Radius of protein	2.84413

[truncated: 3 more sheets: F3-1, F3-2, F3-3]
