# Supplementary material for: In situanalysis of liposome hard and soft protein corona structure and composition in a single label-free workflow
Source: Royal Society of Chemistry journal article supplement (doi:10.1039/c9nr08186k), 2019-12-18
Supplement: c9nr08186k3.xlsx [file c9nr08186k3.xlsx]

## Sheet: Hard corona vs. Plasma
Sequence coverage [%]	Mol. weight [kDa]	MS/MS count	ANOVA q-value	T-test q-value HC_Plasma	T-test Difference HC_Plasma	Gene names	Majority protein IDs	Protein names
48.1	48.803	1287	8.83503e-10	1.88933e-06	7.85525	CLU	P10909-4	Clusterin
66.6	36.154	626	1.0829e-10	3.91863e-06	7.67417	APOE	P02649	Apolipoprotein E
26.8	50.598	280	4.09758e-12	2.67268e-09	6.59316	SERPINA3	G3V5I3	Alpha-1-antichymotrypsin
26.8	39.731	173	7.24583e-09	1.05682e-07	5.65151	PON1	P27169	Serum paraoxonase/arylesterase 1
39.6	10.845	85	1.19004e-05	0.00020517	4.9879	PF4	P02776	Platelet factor 4
54.1	46.736	1060	2.23741e-09	4.87912e-08	4.48877	SERPINA1	P01009	Alpha-1-antitrypsin
32.7	515.6	2040	7.99859e-10	1.53019e-07	4.42487	APOB	P04114	Apolipoprotein B-100
20.7	50.989	132	5.44456e-06	5.01732e-06	4.26635	SERPING1	H9KV48	Plasma protease C1 inhibitor
26.1	12.575	36	0.00117297	0.000235523	4.10491		P04433	Ig kappa chain V-III region VG
56.6	164.94	3299	5.34058e-07	2.14135e-06	4.08579	A2M	H0YGH4	Alpha-2-macroglobulin
19.4	57.07	67	1.1688e-05	3.20961e-06	3.90664	SERPIND1	P05546	Heparin cofactor 2
71.4	49.496	1704	7.26255e-10	5.95716e-08	3.82604	FGG	P02679-2	Fibrinogen gamma chain
19.2	81.859	36	2.28222e-05	0.00111069	3.72438	MASP1	P48740-2	Mannan-binding lectin serine protease 1
26.3	42.253	50	0.0116824	0.000491649	3.66649	IGHD	P01880	Ig delta chain C region
67.9	45.398	1222	8.30709e-08	1.94902e-05	3.45119	APOA4	P06727	Apolipoprotein A-IV
17.1	16.228	59	8.2941e-05	5.88288e-06	3.3798		P06331	Ig heavy chain V-II region ARH-77
36.6	75.507	276	7.45717e-07	3.45142e-06	3.3108	ITIH1	B7Z549	Inter-alpha-trypsin inhibitor heavy chain H1
17.7	53.154	94	4.46173e-06	2.10275e-06	3.26265	AGT	P01019	Angiotensinogen
24.6	64.053	37	0.000305909	0.00171606	3.08752	F11	E9PGP2	Coagulation factor XI
69.4	15.887	274	0.00197751	0.000102917	3.08333	TTR	P02766	Transthyretin
25.8	46.312	16	0.000310107	8.24891e-05	3.04916	SERPINF1	P36955	Pigment epithelium-derived factor
79	30.777	1671	3.73036e-07	1.86792e-06	2.83072	APOA1	P02647	Apolipoprotein A-I
30.4	51.694	33	1.37563e-06	0.00139638	2.70178	ANGPTL6	Q8NI99	Angiopoietin-related protein 6
3.3	141.1	19	3.59238e-05	0.00171207	2.48728	PRG4	Q92954-3	Proteoglycan 4
10.7	21.589	12	1.15455e-05	0.00142171	2.47734	COLEC11	Q9BWP8-8	Collectin-11
38.9	49.306	707	6.75914e-07	4.56574e-06	2.42932	IGHM	P01871	Ig mu chain C region
26.1	11.612	170	5.29164e-07	1.03031e-06	2.40192	IGHV3-23	P01765	Ig heavy chain V-III region TIL
41.1	192.84	1079	1.99155e-07	3.2335e-06	2.3868	C4A	B0V2C8	Complement C4-A
30	25.387	85	0.0138955	0.00798449	2.35561	APCS	P02743	Serum amyloid P-component
45	35.94	84	8.16772e-05	0.000574004	2.35463	IGHG4	P01861	Ig gamma-4 chain C region
25.3	25.773	112	6.0452e-08	4.37375e-06	2.28289	C1QC	P02747	Complement C1q subcomponent subunit C
22.4	41.212	12	0.00194016	0.0115129	2.27962	APOA5	Q6Q788	Apolipoprotein A-V
17.9	188.3	92	8.76698e-05	1.72285e-05	2.1433	C5	P01031	Complement C5
20.1	75.122	101	6.28381e-06	3.45626e-05	2.00557	PROS1	P07225	Vitamin K-dependent protein S
25	13.227	192	6.91766e-07	1.09049e-06	1.99525		P01766	Ig heavy chain V-III region BRO
41.1	501.31	185	4.23161e-05	0.00407206	1.98857	LPA	P08519	Apolipoprotein(a)
62.1	187.15	4062	2.00526e-09	9.11163e-08	1.96837	C3	P01024	Complement C3
22.7	11.284	8	0.00448013	0.00803977	1.95281	DCD	P81605	Dermcidin
4.5	251.7	18	1.62067e-05	0.00171819	1.9395	F5	P12259	Coagulation factor V
42.7	67.033	546	7.43812e-06	0.000837864	1.9214	C4BPA	P04003	C4b-binding protein alpha chain
27.5	54.565	122	4.37218e-05	0.000198417	1.91436	SERPINF2	P08697	Alpha-2-antiplasmin
24.5	76.773	65	0.00526515	0.0060194	1.90248	KLKB1	H0YAC1	Plasma kallikrein
5.1	56.634	20	0.00219497	0.00929387	1.77731	PLTP	B3KUE5	Phospholipid transfer protein
18.8	24.117	89	0.00295361	0.0191166	1.76504	C1QB	D6RA08	Complement C1q subcomponent subunit B
41.3	21.275	239	1.32628e-05	0.000925542	1.75191	APOD	P05090	Apolipoprotein D
38.2	39.029	21	0.00044951	0.0447623	1.74964	HPR	P00739	Haptoglobin-related protein
26.1	75.905	120	1.35195e-05	3.04366e-05	1.74938	C1S	A6NG18	Complement C1s subcomponent
28.7	105.21	530	0.000169978	0.00065159	1.7221	ITIH2	Q5T985	Inter-alpha-trypsin inhibitor heavy chain H2
28.7	54.305	521	1.29916e-08	0.00191684	1.6746	VTN	P04004	Vitronectin
31.4	103.36	312	5.5144e-07	5.12137e-05	1.65391	ITIH4	Q14624	Inter-alpha-trypsin inhibitor heavy chain H4
70.3	36.105	3200	1.14207e-05	0.000280504	1.61218	IGHG1	P01857	Ig gamma-1 chain C region
19.2	42.158	36	0.000211219	0.0140309	1.4599	APOL1	E9PF24	Apolipoprotein L1
64.5	51.676	901	3.2537e-06	0.000395094	1.24122	HPX	P02790	Hemopexin
73.1	55.928	2000	8.51781e-06	0.000707045	1.22665	FGB	P02675	Fibrinogen beta chain
66.1	11.775	289	2.50219e-06	0.000154042	1.16342		P01620	Ig kappa chain V-III region SIE
42.1	23.063	442	0.0102904	0.0203472	1.0907	IGLL5;IGLC1	B9A064	Immunoglobulin lambda-like polypeptide 5
39.7	122.2	713	8.53782e-06	0.00219368	1.025	CP	P00450	Ceruloplasmin
60.4	94.972	2253	5.18915e-07	0.00125288	0.996294	FGA	P02671	Fibrinogen alpha chain
44.7	249.4	1425	3.52055e-06	0.0451309	0.978798	FN1	P02751-14	Fibronectin
37.8	11.935	114	0.000241091	0.0142326	0.633492		P80748	Ig lambda chain V-III region LOI
39.4	52.602	430	1.95798e-05	0.0423183	-0.540007	SERPINC1	P01008	Antithrombin-III
25	65.059	64	9.32356e-06	0.0478504	-0.836046	CFI	G3XAM2	Complement factor I
47.9	54.253	466	0.000142909	0.00258197	-1.18741	A1BG	P04217	Alpha-1B-glycoprotein
27	11.175	340	0.00867967	0.0140567	-1.53141	APOA2	P02652	Apolipoprotein A-II
57.4	36.526	150	0.0178431	0.01258	-1.55589	IGHA2	P01877	Ig alpha-2 chain C region
36.6	71.957	17	0.00221451	0.00192186	-1.70032	KNG1	P01042	Kininogen-1
55	34.258	238	9.42405e-06	0.000272016	-1.78247	AZGP1	P25311	Zinc-alpha-2-glycoprotein
38.9	12.059	64	0.0476112	0.000662468	-2.50253		P01617	Ig kappa chain V-II region TEW
4	100.64	14	0.000521117	0.000803518	-2.82122	GIGYF2	E9PC50	PERQ amino acid-rich with GYF domain-containing protein 2
70.8	11.237	20	0.00505063	0.00504161	-3.01098	IGLC3	P0CG06	Ig lambda-3 chain C regions
Enriched
Depleted

## Sheet: Soft corona vs. Plasma
Sequence coverage [%]	Mol. weight [kDa]	MS/MS count	ANOVA q-value	T-test q-value SC_Plasma	T-test Difference SC_Plasma	Gene names	Majority protein IDs	Protein names
26.8	50.598	280	4.09758e-12	3.48827e-05	5.25794	SERPINA3	G3V5I3	Alpha-1-antichymotrypsin
20.7	50.989	132	5.44456e-06	0.000610639	4.24977	SERPING1	H9KV48	Plasma protease C1 inhibitor
54.1	46.736	1060	2.23741e-09	1.35858e-05	3.88357	SERPINA1	P01009	Alpha-1-antitrypsin
26.8	39.731	173	7.24583e-09	0.000929209	3.52917	PON1	P27169	Serum paraoxonase/arylesterase 1
79	30.777	1671	3.73036e-07	0.000195868	3.15219	APOA1	P02647	Apolipoprotein A-I
56.6	164.94	3299	5.34058e-07	0.000516844	3.14356	A2M	H0YGH4	Alpha-2-macroglobulin
19.4	57.07	67	1.1688e-05	0.00385286	2.96775	SERPIND1	P05546	Heparin cofactor 2
17.7	53.154	94	4.46173e-06	0.000993013	2.85398	AGT	P01019	Angiotensinogen
69.4	15.887	274	0.00197751	0.0367462	2.75002	TTR	P02766	Transthyretin
66.6	36.154	626	1.0829e-10	0.00276305	2.58158	APOE	P02649	Apolipoprotein E
26.1	12.575	36	0.00117297	0.0480818	2.1963		P04433	Ig kappa chain V-III region VG
71.4	49.496	1704	7.26255e-10	0.0108584	1.87853	FGG	P02679-2	Fibrinogen gamma chain
36.6	75.507	276	7.45717e-07	0.010496	1.81293	ITIH1	B7Z549	Inter-alpha-trypsin inhibitor heavy chain H1
29.8	13.38	18	0.000793576	0.0495289	1.74848	IGKV4-1	P06312	Ig kappa chain V-IV region
67.9	45.398	1222	8.30709e-08	0.0230857	1.3041	APOA4	P06727	Apolipoprotein A-IV
26.1	11.612	170	5.29164e-07	0.0317939	1.22718	IGHV3-23	P01765	Ig heavy chain V-III region TIL
38.9	49.306	707	6.75914e-07	0.0144558	1.17568	IGHM	P01871	Ig mu chain C region
27.2	140.94	535	5.3578e-06	0.03765	-1.16752	CFB	B4E1Z4	Complement factor B
68.1	38.298	619	0.00685878	0.0433736	-1.23642	APOH	P02749	Beta-2-glycoprotein 1
28.7	54.305	521	1.29916e-08	0.0229335	-1.26788	VTN	P04004	Vitronectin
48.7	37.654	1509	2.82505e-06	0.0223696	-1.29976	IGHA1	P01876	Ig alpha-1 chain C region
59.9	53.02	1020	0.000746793	0.0220379	-1.60695	GC	D6RF35	Vitamin D-binding protein
26.1	75.905	120	1.35195e-05	0.0450891	-1.74418	C1S	A6NG18	Complement C1s subcomponent
47.9	54.253	466	0.000142909	0.0275114	-1.77038	A1BG	P04217	Alpha-1B-glycoprotein
61.6	90.568	858	0.000226084	0.0268384	-1.80226	PLG	P00747	Plasminogen
30.3	67.046	37	0.000167584	0.00546106	-1.88541	C8B	P07358	Complement component C8 beta chain
36.6	71.957	17	0.00221451	0.0194114	-2.07047	KNG1	P01042	Kininogen-1
28.6	93.517	61	0.00487596	0.0381935	-2.11908	C7	P10643	Complement component C7
38.6	18.121	109	0.000135339	0.0122285	-2.25809	JCHAIN;IGJ	D6RD17	Immunoglobulin J chain
21.8	104.79	50	6.82433e-05	0.0368073	-2.34153	C6	P13671	Complement component C6
20.1	75.122	101	6.28381e-06	0.0309016	-2.38731	PROS1	P07225	Vitamin K-dependent protein S
25	65.059	64	9.32356e-06	0.0222635	-2.48691	CFI	G3XAM2	Complement factor I
55	34.258	238	9.42405e-06	0.00471583	-2.62121	AZGP1	P25311	Zinc-alpha-2-glycoprotein
44.8	13.051	53	0.00278386	0.0110376	-2.73669	APOM	Q5SRP4	Apolipoprotein M
57.4	36.526	150	0.0178431	0.0299876	-2.85621	IGHA2	P01877	Ig alpha-2 chain C region
43.4	10.852	283	7.85887e-08	0.000146619	-3.56666	APOC3	P02656	Apolipoprotein C-III
70.8	11.237	20	0.00505063	0.00531954	-3.68846	IGLC3	P0CG06	Ig lambda-3 chain C regions
Enriched
Depleted

## Sheet: Hard corona vs. Soft corona
Sequence coverage [%]	Mol. weight [kDa]	MS/MS count	ANOVA q-value	T-test q-value HC_SC	T-test Difference HC_SC	Gene names	Majority protein IDs	Protein names
48.1	48.803	1287	8.83503e-10	3.0786e-08	6.20206	CLU	P10909-4	Clusterin
66.6	36.154	626	1.0829e-10	2.09606e-07	5.09259	APOE	P02649	Apolipoprotein E
39.6	10.845	85	1.19004e-05	2.48274e-07	4.72141	PF4	P02776	Platelet factor 4
20.1	75.122	101	6.28381e-06	3.14936e-07	4.39289	PROS1	P07225	Vitamin K-dependent protein S
43.4	10.852	283	7.85887e-08	6.20067e-07	3.88829	APOC3	P02656	Apolipoprotein C-III
41.1	501.31	185	4.23161e-05	1.35897e-05	3.7003	LPA	P08519	Apolipoprotein(a)
26.1	75.905	120	1.35195e-05	4.39595e-07	3.49356	C1S	A6NG18	Complement C1s subcomponent
24.6	64.053	37	0.000305909	1.3585e-05	3.28262	F11	E9PGP2	Coagulation factor XI
32.7	515.6	2040	7.99859e-10	1.39109e-06	3.11653	APOB	P04114	Apolipoprotein B-100
30.4	51.694	33	1.37563e-06	2.5986e-06	3.07382	ANGPTL6	Q8NI99	Angiopoietin-related protein 6
28.7	54.305	521	1.29916e-08	3.02506e-07	2.94247	VTN	P04004	Vitronectin
4.5	251.7	18	1.62067e-05	1.19663e-05	2.82774	F5	P12259	Coagulation factor V
19.2	81.859	36	2.28222e-05	1.18976e-05	2.81836	MASP1	P48740-2	Mannan-binding lectin serine protease 1
35.6	11.284	66	0.000910064	0.00407741	2.73079	APOC2	P02655	Apolipoprotein C-II
19.2	77.199	28	0.00877741	5.1586e-05	2.69729	FBLN1	F8W7M9	Fibulin-1
3.3	141.1	19	3.59238e-05	3.17737e-05	2.55648	PRG4	Q92954-3	Proteoglycan 4
52.7	38.087	112	0.000276691	0.00183873	2.37262	CD5L	O43866	CD5 antigen-like
25.8	46.312	16	0.000310107	9.31545e-05	2.34914	SERPINF1	P36955	Pigment epithelium-derived factor
25	63.173	76	4.61247e-06	7.70382e-05	2.26044	C9	P02748	Complement component C9
34.9	80.118	109	0.00222635	0.00183129	2.24832	C1R	P00736	Complement C1r subcomponent
41.3	21.275	239	1.32628e-05	2.19405e-06	2.16503	APOD	P05090	Apolipoprotein D
67.9	45.398	1222	8.30709e-08	9.96452e-06	2.14709	APOA4	P06727	Apolipoprotein A-IV
42.7	67.033	546	7.43812e-06	7.82967e-06	2.14274	C4BPA	P04003	C4b-binding protein alpha chain
45	35.94	84	8.16772e-05	6.48922e-07	2.12717	IGHG4	P01861	Ig gamma-4 chain C region
26.8	39.731	173	7.24583e-09	6.10757e-06	2.12233	PON1	P27169	Serum paraoxonase/arylesterase 1
21.8	104.79	50	6.82433e-05	0.000575233	2.02983	C6	P13671	Complement component C6
19.2	42.158	36	0.000211219	0.00397735	1.99172	APOL1	E9PF24	Apolipoprotein L1
26.3	42.253	50	0.0116824	0.00512685	1.95528	IGHD	P01880	Ig delta chain C region
71.4	49.496	1704	7.26255e-10	8.62752e-06	1.94751	FGG	P02679-2	Fibrinogen gamma chain
22.4	41.212	12	0.00194016	0.00189997	1.9444	APOA5	Q6Q788	Apolipoprotein A-V
10.7	21.589	12	1.15455e-05	3.75097e-05	1.92106	COLEC11	Q9BWP8-8	Collectin-11
41.1	192.84	1079	1.99155e-07	3.5035e-06	1.91639	C4A	B0V2C8	Complement C4-A
26.1	12.575	36	0.00117297	0.0048403	1.90862		P04433	Ig kappa chain V-III region VG
24.5	66.034	21	0.0178529	0.00267104	1.90354	IGFALS	P35858	Insulin-like growth factor-binding protein complex acid labile subunit
25.3	25.773	112	6.0452e-08	1.38075e-06	1.90014	C1QC	P02747	Complement C1q subcomponent subunit C
22.7	11.284	8	0.00448013	0.000158682	1.89352	DCD	P81605	Dermcidin
17.1	16.228	59	8.2941e-05	0.000109186	1.85368		P06331	Ig heavy chain V-II region ARH-77
18.8	24.117	89	0.00295361	5.5975e-05	1.83819	C1QB	D6RA08	Complement C1q subcomponent subunit B
44.8	13.051	53	0.00278386	0.00129439	1.81983	APOM	Q5SRP4	Apolipoprotein M
60.4	94.972	2253	5.18915e-07	2.88493e-05	1.81382	FGA	P02671	Fibrinogen alpha chain
35.1	30.858	34	0.00884286	0.000320298	1.80686	CFHR1	B1AKG0	Complement factor H-related protein 1
30.3	67.046	37	0.000167584	0.000105125	1.74025	C8B	P07358	Complement component C8 beta chain
28.6	93.517	61	0.00487596	0.00567633	1.71731	C7	P10643	Complement component C7
24.5	76.773	65	0.00526515	0.00163897	1.70178	KLKB1	H0YAC1	Plasma kallikrein
44.7	249.4	1425	3.52055e-06	9.31775e-05	1.66836	FN1	P02751-14	Fibronectin
25	65.059	64	9.32356e-06	0.00230625	1.65086	CFI	G3XAM2	Complement factor I
38.6	18.121	109	0.000135339	0.000164132	1.64679	JCHAIN;IGJ	D6RD17	Immunoglobulin J chain
5.1	56.634	20	0.00219497	5.91545e-05	1.63538	PLTP	B3KUE5	Phospholipid transfer protein
31.4	103.36	312	5.5144e-07	8.98701e-05	1.55956	ITIH4	Q14624	Inter-alpha-trypsin inhibitor heavy chain H4
73.1	55.928	2000	8.51781e-06	5.54124e-05	1.53171	FGB	P02675	Fibrinogen beta chain
36.6	75.507	276	7.45717e-07	3.7111e-05	1.49787	ITIH1	B7Z549	Inter-alpha-trypsin inhibitor heavy chain H1
34.3	11.392	63	6.71999e-05	0.0121879	1.48964		P01714	Ig lambda chain V-III region SH
6	309.26	19	0.00418147	0.020973	1.48565	VWF	P04275	von Willebrand factor
17.9	188.3	92	8.76698e-05	0.00698862	1.43884	C5	P01031	Complement C5
19.1	33.093	13	0.00128885	0.0118534	1.35086	FGL1	E7ERS0	Fibrinogen-like protein 1
22.4	65.163	68	0.000227017	0.00579038	1.34273	C8A	P07357	Complement component C8 alpha chain
26.8	50.598	280	4.09758e-12	0.000528321	1.33522	SERPINA3	G3V5I3	Alpha-1-antichymotrypsin
31.4	46.6	740	8.17683e-05	0.00228383	1.31811	AHSG	F5H0Q5	Alpha-2-HS-glycoprotein
61.1	139.09	899	0.000107608	0.00182993	1.31748	CFH	P08603	Complement factor H
39	59.578	259	5.94508e-05	0.0186424	1.30192	HRG	P04196	Histidine-rich glycoprotein
57.4	36.526	150	0.0178431	0.0313696	1.30032	IGHA2	P01877	Ig alpha-2 chain C region
38.9	49.306	707	6.75914e-07	3.47476e-06	1.25364	IGHM	P01871	Ig mu chain C region
25	13.227	192	6.91766e-07	0.000152154	1.24987		P01766	Ig heavy chain V-III region BRO
26.1	11.612	170	5.29164e-07	0.000249238	1.17474	IGHV3-23	P01765	Ig heavy chain V-III region TIL
62.1	187.15	4062	2.00526e-09	0.000155551	1.15835	C3	P01024	Complement C3
27.5	54.565	122	4.37218e-05	0.0115439	1.11476	SERPINF2	P08697	Alpha-2-antiplasmin
57.6	46.496	511	0.000132723	0.00597961	1.08684	KNG1	B4DPP8	Kininogen-1
36.1	38.999	171	0.00051368	0.0103256	1.07188	AMBP	P02760	Protein AMBP
61.6	90.568	858	0.000226084	0.0151562	1.04209	PLG	P00747	Plasminogen
66.1	11.775	289	2.50219e-06	0.000641795	1.01833		P01620	Ig kappa chain V-III region SIE
48.7	37.654	1509	2.82505e-06	0.000440631	0.982048	IGHA1	P01876	Ig alpha-1 chain C region
56.6	164.94	3299	5.34058e-07	0.00105595	0.942229	A2M	H0YGH4	Alpha-2-macroglobulin
19.4	57.07	67	1.1688e-05	0.00488681	0.938897	SERPIND1	P05546	Heparin cofactor 2
27.2	140.94	535	5.3578e-06	0.00282555	0.874546	CFB	B4E1Z4	Complement factor B
30	25.387	85	0.0138955	0.0473365	0.843506	APCS	P02743	Serum amyloid P-component
55	34.258	238	9.42405e-06	0.0128506	0.838747	AZGP1	P25311	Zinc-alpha-2-glycoprotein
37.8	11.935	114	0.000241091	0.000848323	0.820655		P80748	Ig lambda chain V-III region LOI
96.2	11.293	1018	1.93e-05	0.0087713	0.802114	IGLC2	P0CG05	Ig lambda-2 chain C regions
59.9	53.02	1020	0.000746793	0.0285135	0.78581	GC	D6RF35	Vitamin D-binding protein
64	45.205	2232	5.29711e-06	0.00696613	0.784816	HP	P00738	Haptoglobin
97.2	11.609	1958	9.93443e-06	0.0284961	0.776139	IGKC	P01834	Ig kappa chain C region
68.1	38.298	619	0.00685878	0.037068	0.770817	APOH	P02749	Beta-2-glycoprotein 1
72.5	77.063	4580	0.000781242	0.0176715	0.763488	TF	P02787	Serotransferrin
39.7	122.2	713	8.53782e-06	0.0119375	0.756261	CP	P00450	Ceruloplasmin
28.7	105.21	530	0.000169978	0.0187572	0.708726	ITIH2	Q5T985	Inter-alpha-trypsin inhibitor heavy chain H2
54.1	46.736	1060	2.23741e-09	0.0110596	0.605202	SERPINA1	P01009	Alpha-1-antitrypsin
27	11.175	340	0.00867967	0.00253737	-1.0305	APOA2	P02652	Apolipoprotein A-II
4	100.64	14	0.000521117	0.00230644	-1.94549	GIGYF2	E9PC50	PERQ amino acid-rich with GYF domain-containing protein 2
38.9	12.059	64	0.0476112	0.0115788	-2.24279		P01617	Ig kappa chain V-II region TEW
26.5	9.3318	25	0.000296326	0.00379231	-2.35537	APOC1	P02654	Apolipoprotein C-I
Enriched
Depleted
