# Supplementary material for: In situanalysis of liposome hard and soft protein corona structure and composition in a single label-free workflow
Source: Royal Society of Chemistry journal article supplement (doi:10.1039/c9nr08186k), 2019-12-18
Supplement: c9nr08186k4.xlsx [file c9nr08186k4.xlsx]

## Sheet: Hard vs. Soft corona - F1
Sequence coverage [%]	Mol. weight [kDa]	MS/MS count	ANOVA q-value	T-test q-value HC1_SC1	T-test Difference HC1_SC1	Gene names	Majority protein IDs	Protein names
48.1	48.803	1287	8.83503e-10	0.0197684	7.16256	CLU	P10909-4	Clusterin
66.6	36.154	626	1.0829e-10	0.0110601	6.39252	APOE	P02649	Apolipoprotein E
39.6	10.845	85	1.19004e-05	0.0115441	5.90195	PF4	P02776	Platelet factor 4
43.4	10.852	283	7.85887e-08	0.00869766	5.27158	APOC3	P02656	Apolipoprotein C-III
41.1	501.31	185	4.23161e-05	0.0269707	5.16767	LPA	P08519	Apolipoprotein(a)
20.1	75.122	101	6.28381e-06	0.011939	5.07618	PROS1	P07225	Vitamin K-dependent protein S
30.4	51.694	33	1.37563e-06	0.00895403	4.08188	ANGPTL6	Q8NI99	Angiopoietin-related protein 6
32.7	515.6	2040	7.99859e-10	0.0113055	3.78102	APOB	P04114	Apolipoprotein B-100
28.7	54.305	521	1.29916e-08	0.0100914	3.71875	VTN	P04004	Vitronectin
19.2	42.158	36	0.000211219	0.0255532	3.66858	APOL1	E9PF24	Apolipoprotein L1
3.3	141.1	19	3.59238e-05	0.0116656	3.62223	PRG4	Q92954-3	Proteoglycan 4
24.6	64.053	37	0.000305909	0.0358067	3.61898	F11	E9PGP2	Coagulation factor XI
26.1	75.905	120	1.35195e-05	0.00922873	3.35051	C1S	A6NG18	Complement C1s subcomponent
22.4	41.212	12	0.00194016	0.011102	3.31025	APOA5	Q6Q788	Apolipoprotein A-V
25.8	46.312	16	0.000310107	0.0381878	3.29587	SERPINF1	P36955	Pigment epithelium-derived factor
19.2	81.859	36	2.28222e-05	0.0117112	3.23031	MASP1	P48740-2	Mannan-binding lectin serine protease 1
4.5	251.7	18	1.62067e-05	0.0183289	3.10682	F5	P12259	Coagulation factor V
24.5	66.034	21	0.0178529	0.0103494	3.0931	IGFALS	P35858	Insulin-like growth factor-binding protein complex acid labile subunit
67.9	45.398	1222	8.30709e-08	0.0127155	3.00949	APOA4	P06727	Apolipoprotein A-IV
21.8	104.79	50	6.82433e-05	0.0187172	3.00185	C6	P13671	Complement component C6
44.8	13.051	53	0.00278386	0.0264326	2.94346	APOM	Q5SRP4	Apolipoprotein M
30.3	67.046	37	0.000167584	0.0115667	2.87041	C8B	P07358	Complement component C8 beta chain
22.7	11.284	8	0.00448013	0.0123611	2.73476	DCD	P81605	Dermcidin
41.3	21.275	239	1.32628e-05	0.0106865	2.72513	APOD	P05090	Apolipoprotein D
42.7	67.033	546	7.43812e-06	0.0127799	2.69758	C4BPA	P04003	C4b-binding protein alpha chain
25.2	62.216	52	0.0050237	0.0252442	2.68655	PGLYRP2	Q96PD5	N-acetylmuramoyl-L-alanine amidase
19.1	33.093	13	0.00128885	0.0283931	2.55104	FGL1	E7ERS0	Fibrinogen-like protein 1
10.7	21.589	12	1.15455e-05	0.0112383	2.53173	COLEC11	Q9BWP8-8	Collectin-11
35.1	30.858	34	0.00884286	0.0380021	2.52754	CFHR1	B1AKG0	Complement factor H-related protein 1
26.3	42.253	50	0.0116824	0.0448753	2.52332	IGHD	P01880	Ig delta chain C region
28.6	93.517	61	0.00487596	0.0106046	2.51791	C7	P10643	Complement component C7
26.8	39.731	173	7.24583e-09	0.00895734	2.49337	PON1	P27169	Serum paraoxonase/arylesterase 1
25	65.059	64	9.32356e-06	0.0119524	2.40827	CFI	G3XAM2	Complement factor I
26.1	12.575	36	0.00117297	0.0320695	2.38666		P04433	Ig kappa chain V-III region VG
17.9	188.3	92	8.76698e-05	0.0192179	2.3363	C5	P01031	Complement C5
41.1	192.84	1079	1.99155e-07	0.0109478	2.3225	C4A	B0V2C8	Complement C4-A
17.1	16.228	59	8.2941e-05	0.0118455	2.30734		P06331	Ig heavy chain V-II region ARH-77
45	35.94	84	8.16772e-05	0.0195028	2.27944	IGHG4	P01861	Ig gamma-4 chain C region
25	63.173	76	4.61247e-06	0.0151693	2.24762	C9	P02748	Complement component C9
25.3	25.773	112	6.0452e-08	0.0111289	2.05222	C1QC	P02747	Complement C1q subcomponent subunit C
5.1	56.634	20	0.00219497	0.0399947	2.02917	PLTP	B3KUE5	Phospholipid transfer protein
60.4	94.972	2253	5.18915e-07	0.0114041	1.97551	FGA	P02671	Fibrinogen alpha chain
31.4	103.36	312	5.5144e-07	0.0111229	1.87258	ITIH4	Q14624	Inter-alpha-trypsin inhibitor heavy chain H4
38.6	18.121	109	0.000135339	0.0190381	1.85051	JCHAIN;IGJ	D6RD17	Immunoglobulin J chain
71.4	49.496	1704	7.26255e-10	0.0109011	1.75954	FGG	P02679-2	Fibrinogen gamma chain
18.8	24.117	89	0.00295361	0.0107671	1.70506	C1QB	D6RA08	Complement C1q subcomponent subunit B
34.3	11.392	63	6.71999e-05	0.0307007	1.66251		P01714	Ig lambda chain V-III region SH
24.5	76.773	65	0.00526515	0.0495328	1.61543	KLKB1	H0YAC1	Plasma kallikrein
13.5	45.147	20	0.00527459	0.0131027	1.5002	CFP	E9PAQ1	Properdin
73.1	55.928	2000	8.51781e-06	0.0181117	1.49181	FGB	P02675	Fibrinogen beta chain
61.1	139.09	899	0.000107608	0.0302071	1.48585	CFH	P08603	Complement factor H
38.9	49.306	707	6.75914e-07	0.0106584	1.42545	IGHM	P01871	Ig mu chain C region
26.8	50.598	280	4.09758e-12	0.0182916	1.40138	SERPINA3	G3V5I3	Alpha-1-antichymotrypsin
44.7	249.4	1425	3.52055e-06	0.0392138	1.38935	FN1	P02751-14	Fibronectin
36.6	75.507	276	7.45717e-07	0.030586	1.36925	ITIH1	B7Z549	Inter-alpha-trypsin inhibitor heavy chain H1
61.6	90.568	858	0.000226084	0.039383	1.29692	PLG	P00747	Plasminogen
62.1	187.15	4062	2.00526e-09	0.0108878	1.24935	C3	P01024	Complement C3
26.1	11.612	170	5.29164e-07	0.036374	1.2454	IGHV3-23	P01765	Ig heavy chain V-III region TIL
25	13.227	192	6.91766e-07	0.0260445	1.20398		P01766	Ig heavy chain V-III region BRO
30	25.387	85	0.0138955	0.0461	1.09862	APCS	P02743	Serum amyloid P-component
36.1	38.999	171	0.00051368	0.0496432	1.05683	AMBP	P02760	Protein AMBP
56.6	164.94	3299	5.34058e-07	0.0235471	0.976444	A2M	H0YGH4	Alpha-2-macroglobulin
66.1	11.775	289	2.50219e-06	0.0185557	0.969706		P01620	Ig kappa chain V-III region SIE
48.7	37.654	1509	2.82505e-06	0.0345858	0.943159	IGHA1	P01876	Ig alpha-1 chain C region
72.5	77.063	4580	0.000781242	0.0336099	0.872073	TF	P02787	Serotransferrin
27.2	140.94	535	5.3578e-06	0.0465292	0.815554	CFB	B4E1Z4	Complement factor B
62.3	35.9	771	0.00282724	0.0364409	0.797322	IGHG2	P01859	Ig gamma-2 chain C region
97.2	11.609	1958	9.93443e-06	0.0364931	0.782248	IGKC	P01834	Ig kappa chain C region
Enriched
Depleted

## Sheet: Hard vs. Soft corona - F2
Sequence coverage [%]	Mol. weight [kDa]	MS/MS count	ANOVA q-value	T-test q-value HC2_SC2	T-test Difference HC2_SC2	Gene names	Majority protein IDs	Protein names
48.1	48.803	1287	8.83503e-10	0.00175555	5.10337	CLU	P10909-4	Clusterin
39.6	10.845	85	1.19004e-05	0.0470267	4.40351	PF4	P02776	Platelet factor 4
66.6	36.154	626	1.0829e-10	0.00230483	4.38327	APOE	P02649	Apolipoprotein E
4.5	251.7	18	1.62067e-05	0.00783854	3.93419	F5	P12259	Coagulation factor V
19.2	77.199	28	0.00877741	0.0118635	3.88231	FBLN1	F8W7M9	Fibulin-1
30.4	51.694	33	1.37563e-06	0.00447378	3.81304	ANGPTL6	Q8NI99	Angiopoietin-related protein 6
24.6	64.053	37	0.000305909	0.0381018	3.78273	F11	E9PGP2	Coagulation factor XI
20.1	75.122	101	6.28381e-06	0.0251056	3.54245	PROS1	P07225	Vitamin K-dependent protein S
43.4	10.852	283	7.85887e-08	0.00460122	3.44062	APOC3	P02656	Apolipoprotein C-III
3.3	141.1	19	3.59238e-05	0.0303816	3.08187	PRG4	Q92954-3	Proteoglycan 4
19.2	81.859	36	2.28222e-05	0.0328348	3.03667	MASP1	P48740-2	Mannan-binding lectin serine protease 1
41.1	501.31	185	4.23161e-05	0.00686877	2.73135	LPA	P08519	Apolipoprotein(a)
10.7	21.589	12	1.15455e-05	0.00656366	2.29427	COLEC11	Q9BWP8-8	Collectin-11
28.7	54.305	521	1.29916e-08	0.00672264	2.27107	VTN	P04004	Vitronectin
5.1	56.634	20	0.00219497	0.0235057	2.12351	PLTP	B3KUE5	Phospholipid transfer protein
32.7	515.6	2040	7.99859e-10	0.00857362	2.04356	APOB	P04114	Apolipoprotein B-100
45	35.94	84	8.16772e-05	0.032506	1.75021	IGHG4	P01861	Ig gamma-4 chain C region
44.7	249.4	1425	3.52055e-06	0.00804421	1.60019	FN1	P02751-14	Fibronectin
25.3	25.773	112	6.0452e-08	0.00505403	1.4653	C1QC	P02747	Complement C1q subcomponent subunit C
71.4	49.496	1704	7.26255e-10	0.00882738	1.38377	FGG	P02679-2	Fibrinogen gamma chain
67.9	45.398	1222	8.30709e-08	0.0074837	1.33814	APOA4	P06727	Apolipoprotein A-IV
60.4	94.972	2253	5.18915e-07	0.00399562	1.26958	FGA	P02671	Fibrinogen alpha chain
26.8	39.731	173	7.24583e-09	0.00437225	1.16968	PON1	P27169	Serum paraoxonase/arylesterase 1
41.1	192.84	1079	1.99155e-07	0.0295617	1.0175	C4A	B0V2C8	Complement C4-A
38.9	49.306	707	6.75914e-07	0.0223937	0.977005	IGHM	P01871	Ig mu chain C region
31.4	103.36	312	5.5144e-07	0.025652	0.817737	ITIH4	Q14624	Inter-alpha-trypsin inhibitor heavy chain H4
62.1	187.15	4062	2.00526e-09	0.0495034	0.510821	C3	P01024	Complement C3
39.4	52.602	430	1.95798e-05	0.0258548	-0.713184	SERPINC1	P01008	Antithrombin-III
29.8	13.38	18	0.000793576	0.0490622	-1.2685	IGKV4-1	P06312	Ig kappa chain V-IV region
38.9	12.059	64	0.0476112	0.0253465	-3.5269		P01617	Ig kappa chain V-II region TEW
26.5	9.3318	25	0.000296326	0.0121566	-4.43334	APOC1	P02654	Apolipoprotein C-I
Enriched
Depleted

## Sheet: Hard vs. Soft corona - F3
Sequence coverage [%]	Mol. weight [kDa]	MS/MS count	ANOVA q-value	T-test q-value HC3_SC3	T-test Difference HC3_SC3	Gene names	Majority protein IDs	Protein names
48.1	48.803	1287	8.83503e-10	0.0003876	6.34024	CLU	P10909-4	Clusterin
20.1	75.122	101	6.28381e-06	0.00440137	4.56004	PROS1	P07225	Vitamin K-dependent protein S
66.6	36.154	626	1.0829e-10	0.000185745	4.50197	APOE	P02649	Apolipoprotein E
26.1	75.905	120	1.35195e-05	0.000933676	3.97728	C1S	A6NG18	Complement C1s subcomponent
39.6	10.845	85	1.19004e-05	0.00241038	3.85876	PF4	P02776	Platelet factor 4
35.6	11.284	66	0.000910064	0.00584393	3.52655	APOC2	P02655	Apolipoprotein C-II
32.7	515.6	2040	7.99859e-10	0.000617961	3.52502	APOB	P04114	Apolipoprotein B-100
25	63.173	76	4.61247e-06	0.00135078	3.2522	C9	P02748	Complement component C9
41.1	501.31	185	4.23161e-05	0.00694823	3.20187	LPA	P08519	Apolipoprotein(a)
52.7	38.087	112	0.000276691	0.00258266	3.15833	CD5L	O43866	CD5 antigen-like
34.9	80.118	109	0.00222635	0.000158925	3.09046	C1R	P00736	Complement C1r subcomponent
43.4	10.852	283	7.85887e-08	0.00881129	2.95267	APOC3	P02656	Apolipoprotein C-III
34.3	11.392	63	6.71999e-05	0.0160713	2.91006		P01714	Ig lambda chain V-III region SH
39	59.578	259	5.94508e-05	0.00525996	2.86875	HRG	P04196	Histidine-rich glycoprotein
28.7	54.305	521	1.29916e-08	0.000418082	2.83761	VTN	P04004	Vitronectin
24.5	76.773	65	0.00526515	0.0183237	2.80695	KLKB1	H0YAC1	Plasma kallikrein
42.7	67.033	546	7.43812e-06	0.000126917	2.70556	C4BPA	P04003	C4b-binding protein alpha chain
26.8	39.731	173	7.24583e-09	0.000387028	2.70394	PON1	P27169	Serum paraoxonase/arylesterase 1
71.4	49.496	1704	7.26255e-10	0.000336794	2.69923	FGG	P02679-2	Fibrinogen gamma chain
21.8	104.79	50	6.82433e-05	0.0102291	2.65591	C6	P13671	Complement component C6
22.4	65.163	68	0.000227017	0.000915419	2.60092	C8A	P07357	Complement component C8 alpha chain
63.3	52.963	32	0.0143686	0.00233006	2.59483	GC	P02774	Vitamin D-binding protein
26.1	12.575	36	0.00117297	0.0174671	2.55063		P04433	Ig kappa chain V-III region VG
28.6	93.517	61	0.00487596	0.0185794	2.46651	C7	P10643	Complement component C7
24.6	64.053	37	0.000305909	0.00371538	2.44614	F11	E9PGP2	Coagulation factor XI
18.8	24.117	89	0.00295361	0.00589493	2.41329	C1QB	D6RA08	Complement C1q subcomponent subunit B
41.1	192.84	1079	1.99155e-07	0.000371274	2.40916	C4A	B0V2C8	Complement C4-A
38.6	18.121	109	0.000135339	0.000839647	2.40401	JCHAIN;IGJ	D6RD17	Immunoglobulin J chain
25	65.059	64	9.32356e-06	0.00152776	2.39485	CFI	G3XAM2	Complement factor I
41.3	21.275	239	1.32628e-05	0.00175477	2.3565	APOD	P05090	Apolipoprotein D
45	35.94	84	8.16772e-05	0.000695329	2.35187	IGHG4	P01861	Ig gamma-4 chain C region
61.1	139.09	899	0.000107608	0.000127678	2.34045	CFH	P08603	Complement factor H
31.4	46.6	740	8.17683e-05	0.000334924	2.31763	AHSG	F5H0Q5	Alpha-2-HS-glycoprotein
27.5	54.565	122	4.37218e-05	0.00393057	2.29904	SERPINF2	P08697	Alpha-2-antiplasmin
36.1	38.999	171	0.00051368	0.00054257	2.27018	AMBP	P02760	Protein AMBP
26.8	50.598	280	4.09758e-12	0.000242831	2.22575	SERPINA3	G3V5I3	Alpha-1-antichymotrypsin
39.2	69.068	163	0.00218998	0.000395937	2.20843	AFM	P43652	Afamin
17.1	16.228	59	8.2941e-05	0.0459411	2.19759		P06331	Ig heavy chain V-II region ARH-77
60.4	94.972	2253	5.18915e-07	0.00184006	2.19638	FGA	P02671	Fibrinogen alpha chain
19.2	81.859	36	2.28222e-05	0.00185618	2.18812	MASP1	P48740-2	Mannan-binding lectin serine protease 1
25.3	25.773	112	6.0452e-08	0.00134584	2.1829	C1QC	P02747	Complement C1q subcomponent subunit C
36.6	75.507	276	7.45717e-07	0.000344955	2.15362	ITIH1	B7Z549	Inter-alpha-trypsin inhibitor heavy chain H1
61.6	90.568	858	0.000226084	0.000320823	2.15224	PLG	P00747	Plasminogen
26.3	42.253	50	0.0116824	0.018051	2.14797	IGHD	P01880	Ig delta chain C region
57.6	46.496	511	0.000132723	0.000413933	2.11322	KNG1	B4DPP8	Kininogen-1
73.1	55.928	2000	8.51781e-06	0.00394324	2.1077	FGB	P02675	Fibrinogen beta chain
67.9	45.398	1222	8.30709e-08	0.000352627	2.09363	APOA4	P06727	Apolipoprotein A-IV
19.2	77.199	28	0.00877741	0.00436954	2.07241	FBLN1	F8W7M9	Fibulin-1
44.7	249.4	1425	3.52055e-06	0.000569821	2.01553	FN1	P02751-14	Fibronectin
25.8	46.312	16	0.000310107	0.0245814	2.00647	SERPINF1	P36955	Pigment epithelium-derived factor
31.4	103.36	312	5.5144e-07	0.00035204	1.98838	ITIH4	Q14624	Inter-alpha-trypsin inhibitor heavy chain H4
19.2	42.158	36	0.000211219	0.0183664	1.92144	APOL1	E9PF24	Apolipoprotein L1
97.2	11.609	1958	9.93443e-06	0.000394865	1.88948	IGKC	P01834	Ig kappa chain C region
25	13.227	192	6.91766e-07	0.000866152	1.84574		P01766	Ig heavy chain V-III region BRO
68.1	38.298	619	0.00685878	0.000367085	1.80969	APOH	P02749	Beta-2-glycoprotein 1
38.2	39.029	21	0.00044951	0.0180241	1.76602	HPR	P00739	Haptoglobin-related protein
47.9	70.036	547	0.00359771	0.00363498	1.73842	F2	P00734	Prothrombin
59.9	53.02	1020	0.000746793	0.00033251	1.73191	GC	D6RF35	Vitamin D-binding protein
62.1	187.15	4062	2.00526e-09	0.000182131	1.71487	C3	P01024	Complement C3
27.2	140.94	535	5.3578e-06	0.000919531	1.68789	CFB	B4E1Z4	Complement factor B
55	34.258	238	9.42405e-06	0.000466948	1.66388	AZGP1	P25311	Zinc-alpha-2-glycoprotein
62.3	35.9	771	0.00282724	0.000386423	1.65977	IGHG2	P01859	Ig gamma-2 chain C region
26.1	11.612	170	5.29164e-07	0.000672907	1.65731	IGHV3-23	P01765	Ig heavy chain V-III region TIL
72.5	77.063	4580	0.000781242	0.000314003	1.61933	TF	P02787	Serotransferrin
56.6	164.94	3299	5.34058e-07	0.000534247	1.61837	A2M	H0YGH4	Alpha-2-macroglobulin
64	45.205	2232	5.29711e-06	0.000365637	1.61022	HP	P00738	Haptoglobin
66.1	11.775	289	2.50219e-06	0.00137873	1.59092		P01620	Ig kappa chain V-III region SIE
48.7	37.654	1509	2.82505e-06	0.000203354	1.57171	IGHA1	P01876	Ig alpha-1 chain C region
39.7	122.2	713	8.53782e-06	0.000608479	1.56302	CP	P00450	Ceruloplasmin
47.9	54.253	466	0.000142909	0.003719	1.48999	A1BG	P04217	Alpha-1B-glycoprotein
96.2	11.293	1018	1.93e-05	0.000337839	1.46135	IGLC2	P0CG05	Ig lambda-2 chain C regions
62.1	41.287	654	0.0351619	0.000579871	1.43833	IGHG3	P01860	Ig gamma-3 chain C region
39.4	52.602	430	1.95798e-05	0.00792359	1.40592	SERPINC1	P01008	Antithrombin-III
19.4	57.07	67	1.1688e-05	0.0467518	1.38514	SERPIND1	P05546	Heparin cofactor 2
38.9	49.306	707	6.75914e-07	0.00071192	1.35848	IGHM	P01871	Ig mu chain C region
28.7	105.21	530	0.000169978	0.0006283	1.35645	ITIH2	Q5T985	Inter-alpha-trypsin inhibitor heavy chain H2
70.3	36.105	3200	1.14207e-05	0.00108056	1.33984	IGHG1	P01857	Ig gamma-1 chain C region
30.4	51.694	33	1.37563e-06	0.024182	1.32653	ANGPTL6	Q8NI99	Angiopoietin-related protein 6
64.5	51.676	901	3.2537e-06	0.000565364	1.28771	HPX	P02790	Hemopexin
37.8	11.935	114	0.000241091	0.000359578	1.09527		P80748	Ig lambda chain V-III region LOI
17.7	53.154	94	4.46173e-06	0.00163401	1.08973	AGT	P01019	Angiotensinogen
54.1	46.736	1060	2.23741e-09	0.0196559	0.931596	SERPINA1	P01009	Alpha-1-antitrypsin
5.1	56.634	20	0.00219497	0.012181	0.753456	PLTP	B3KUE5	Phospholipid transfer protein
39.3	23.511	461	0.000666608	0.0257705	0.526561	ORM1	P02763	Alpha-1-acid glycoprotein 1
27	11.175	340	0.00867967	0.00427682	-0.956448	APOA2	P02652	Apolipoprotein A-II
26.5	9.3318	25	0.000296326	0.0244226	-1.57293	APOC1	P02654	Apolipoprotein C-I
13.5	45.147	20	0.00527459	0.0206866	-2.00973	CFP	E9PAQ1	Properdin
4	100.64	14	0.000521117	0.00533626	-3.08765	GIGYF2	E9PC50	PERQ amino acid-rich with GYF domain-containing protein 2
4	24.329	25	0.00959154	0.0352288	-3.69622	TMEM198	C9JXI5	Transmembrane protein 198
Enriched
Depleted
