# Supplementary material for: In situanalysis of liposome hard and soft protein corona structure and composition in a single label-free workflow
Source: Royal Society of Chemistry journal article supplement (doi:10.1039/c9nr08186k), 2019-12-18
Supplement: c9nr08186k5.xlsx [file c9nr08186k5.xlsx]

## Sheet: SC1_SC2
Sequence coverage [%]	Mol. weight [kDa]	MS/MS count	ANOVA q-value	T-test q-value SC1_SC2	T-test Difference SC1_SC2	Protein names	Gene names	Majority protein IDs	Protein names
25.3	25.773	112	6.0452e-08	0.035642	-0.757174	Complement C1q subcomponent subunit C	C1QC	P02747	Complement C1q subcomponent subunit C
27	11.175	340	0.00867967	0.0460028	-0.829958	Apolipoprotein A-II;Proapolipoprotein A-II;Truncated apolipoprotein A-II	APOA2	P02652	Apolipoprotein A-II
66.1	11.775	289	2.50219e-06	0.0402276	-0.848169	Ig kappa chain V-III region SIE;Ig kappa chain V-III region GOL;Ig kappa chain V-III region Ti		P01620	Ig kappa chain V-III region SIE
27.2	140.94	535	5.3578e-06	0.0385432	-0.872513	Complement factor B;Complement factor B Ba fragment;Complement factor B Bb fragment	CFB	B4E1Z4	Complement factor B
54.1	46.736	1060	2.23741e-09	0.0422632	-0.874515	Alpha-1-antitrypsin;Short peptide from AAT	SERPINA1	P01009	Alpha-1-antitrypsin
48.7	37.654	1509	2.82505e-06	0.043636	-0.875596	Ig alpha-1 chain C region	IGHA1	P01876	Ig alpha-1 chain C region
56.6	164.94	3299	5.34058e-07	0.036738	-0.914593	Alpha-2-macroglobulin	A2M	H0YGH4	Alpha-2-macroglobulin
64	45.205	2232	5.29711e-06	0.0486183	-0.971453	Haptoglobin;Haptoglobin alpha chain;Haptoglobin beta chain	HP	P00738	Haptoglobin
26.8	39.731	173	7.24583e-09	0.0491949	-1.0043	Serum paraoxonase/arylesterase 1	PON1	P27169	Serum paraoxonase/arylesterase 1
67.9	45.398	1222	8.30709e-08	0.0406555	-1.0089	Apolipoprotein A-IV	APOA4	P06727	Apolipoprotein A-IV
96.2	11.293	1018	1.93e-05	0.0404405	-1.02018	Ig lambda-2 chain C regions	IGLC2	P0CG05	Ig lambda-2 chain C regions
62.1	187.15	4062	2.00526e-09	0.0382537	-1.0432	Complement C3;Complement C3 beta chain;C3-beta-c;Complement C3 alpha chain;C3a anaphylatoxin;Acylation stimulating protein;Complement C3b alpha chain;Complement C3c alpha chain fragment 1;Complement C3dg fragment;Complement C3g fragment;Complement C3d fragment;Complement C3f fragment;Complement C3c alpha chain fragment 2	C3	P01024	Complement C3
41.1	192.84	1079	1.99155e-07	0.0403801	-1.06698	Complement C4-A;Complement C4 beta chain;Complement C4-A alpha chain;C4a anaphylatoxin;C4b-A;C4d-A;Complement C4 gamma chain	C4A	B0V2C8	Complement C4-A
64.5	51.676	901	3.2537e-06	0.0376848	-1.07308	Hemopexin	HPX	P02790	Hemopexin
39.7	122.2	713	8.53782e-06	0.0294332	-1.14882	Ceruloplasmin	CP	P00450	Ceruloplasmin
72.5	77.063	4580	0.000781242	0.0317438	-1.14975	Serotransferrin	TF	P02787	Serotransferrin
62.1	41.287	654	0.0351619	0.0415469	-1.16416	Ig gamma-3 chain C region	IGHG3	P01860	Ig gamma-3 chain C region
70.3	36.105	3200	1.14207e-05	0.0412387	-1.16695	Ig gamma-1 chain C region	IGHG1	P01857	Ig gamma-1 chain C region
59.9	53.02	1020	0.000746793	0.0306843	-1.19239	Vitamin D-binding protein	GC	D6RF35	Vitamin D-binding protein
28.7	105.21	530	0.000169978	0.0367111	-1.20042	Inter-alpha-trypsin inhibitor heavy chain H2	ITIH2	Q5T985	Inter-alpha-trypsin inhibitor heavy chain H2
36.1	38.999	171	0.00051368	0.0453066	-1.21198	Protein AMBP;Alpha-1-microglobulin;Inter-alpha-trypsin inhibitor light chain;Trypstatin	AMBP	P02760	Protein AMBP
48.1	48.803	1287	8.83503e-10	0.0444843	-1.23359	Clusterin;Clusterin beta chain;Clusterin alpha chain;Clusterin	CLU	P10909-4	Clusterin
61.1	139.09	899	0.000107608	0.0378357	-1.2742	Complement factor H	CFH	P08603	Complement factor H
39.3	23.511	461	0.000666608	0.0464363	-1.29158	Alpha-1-acid glycoprotein 1	ORM1	P02763	Alpha-1-acid glycoprotein 1
60.4	94.972	2253	5.18915e-07	0.0408658	-1.3102	Fibrinogen alpha chain;Fibrinopeptide A;Fibrinogen alpha chain	FGA	P02671	Fibrinogen alpha chain
31.4	103.36	312	5.5144e-07	0.0364467	-1.31254	Inter-alpha-trypsin inhibitor heavy chain H4;70 kDa inter-alpha-trypsin inhibitor heavy chain H4;35 kDa inter-alpha-trypsin inhibitor heavy chain H4	ITIH4	Q14624	Inter-alpha-trypsin inhibitor heavy chain H4
47.9	70.036	547	0.00359771	0.0401898	-1.32177	Prothrombin;Activation peptide fragment 1;Activation peptide fragment 2;Thrombin light chain;Thrombin heavy chain	F2	P00734	Prothrombin
26.8	50.598	280	4.09758e-12	0.0333812	-1.34935	Alpha-1-antichymotrypsin;Alpha-1-antichymotrypsin His-Pro-less	SERPINA3	G3V5I3	Alpha-1-antichymotrypsin
97.2	11.609	1958	9.93443e-06	0.0304605	-1.34979	Ig kappa chain C region	IGKC	P01834	Ig kappa chain C region
57.6	46.496	511	0.000132723	0.0410608	-1.38213	Kininogen-1;Kininogen-1 heavy chain;T-kinin;Bradykinin;Lysyl-bradykinin;Kininogen-1 light chain;Low molecular weight growth-promoting factor	KNG1	B4DPP8	Kininogen-1
17.1	16.228	59	8.2941e-05	0.0412598	-1.41515	Ig heavy chain V-II region ARH-77;Ig heavy chain V-II region NEWM		P06331	Ig heavy chain V-II region ARH-77
32.7	515.6	2040	7.99859e-10	0.0401437	-1.43648	Apolipoprotein B-100;Apolipoprotein B-48	APOB	P04114	Apolipoprotein B-100
22.4	65.163	68	0.000227017	0.0300133	-1.52057	Complement component C8 alpha chain	C8A	P07357	Complement component C8 alpha chain
27.5	54.565	122	4.37218e-05	0.048256	-1.52794	Alpha-2-antiplasmin	SERPINF2	P08697	Alpha-2-antiplasmin
61.6	90.568	858	0.000226084	0.0343737	-1.52971	Plasminogen;Plasmin heavy chain A;Activation peptide;Angiostatin;Plasmin heavy chain A, short form;Plasmin light chain B	PLG	P00747	Plasminogen
39.4	52.602	430	1.95798e-05	0.0437375	-1.55964	Antithrombin-III	SERPINC1	P01008	Antithrombin-III
34.3	11.392	63	6.71999e-05	0.0401148	-1.637	Ig lambda chain V-III region SH		P01714	Ig lambda chain V-III region SH
62.3	35.9	771	0.00282724	0.027006	-1.7939	Ig gamma-2 chain C region	IGHG2	P01859	Ig gamma-2 chain C region
24.5	66.034	21	0.0178529	0.0372754	-1.80872	Insulin-like growth factor-binding protein complex acid labile subunit	IGFALS	P35858	Insulin-like growth factor-binding protein complex acid labile subunit
39	59.578	259	5.94508e-05	0.0401348	-1.98902	Histidine-rich glycoprotein	HRG	P04196	Histidine-rich glycoprotein
28.6	93.517	61	0.00487596	0.0379259	-2.08208	Complement component C7	C7	P10643	Complement component C7
29.8	13.38	18	0.000793576	0.0308131	-2.14215	Ig kappa chain V-IV region;Ig kappa chain V-IV region JI;Ig kappa chain V-IV region B17;Ig kappa chain V-IV region STH	IGKV4-1	P06312	Ig kappa chain V-IV region
38.2	39.029	21	0.00044951	0.0316183	-2.16716	Haptoglobin-related protein	HPR	P00739	Haptoglobin-related protein
25	65.059	64	9.32356e-06	0.0434587	-2.31214	Complement factor I;Complement factor I heavy chain;Complement factor I light chain	CFI	G3XAM2	Complement factor I
21.8	104.79	50	6.82433e-05	0.0405478	-2.32977	Complement component C6	C6	P13671	Complement component C6
17.9	188.3	92	8.76698e-05	0.0372689	-2.46316	Complement C5;Complement C5 beta chain;Complement C5 alpha chain;C5a anaphylatoxin;Complement C5 alpha chain	C5	P01031	Complement C5
25.2	62.216	52	0.0050237	0.0658612	-2.96471	N-acetylmuramoyl-L-alanine amidase	PGLYRP2	Q96PD5	N-acetylmuramoyl-L-alanine amidase
19.2	42.158	36	0.000211219	0.0466364	-3.01982	Apolipoprotein L1	APOL1	E9PF24	Apolipoprotein L1
Enriched
Depleted

## Sheet: SC2_SC3
Sequence coverage [%]	Mol. weight [kDa]	MS/MS count	ANOVA q-value	T-test q-value SC2_SC3	T-test Difference SC2_SC3	Gene names	Majority protein IDs	Protein names
26.5	9.3318	25	0.000296326	0.00447668	3.25194	APOC1	P02654	Apolipoprotein C-I
35.6	11.284	66	0.000910064	0.0102818	3.21111	APOC2	P02655	Apolipoprotein C-II
34.3	11.392	63	6.71999e-05	0.0122678	3.02679		P01714	Ig lambda chain V-III region SH
39	59.578	259	5.94508e-05	0.00700829	2.74012	HRG	P04196	Histidine-rich glycoprotein
52.7	38.087	112	0.000276691	0.00680811	2.59714	CD5L	O43866	CD5 antigen-like
39.2	69.068	163	0.00218998	0.00235907	2.26185	AFM	P43652	Afamin
19.2	42.158	36	0.000211219	0.0054829	2.25497	APOL1	E9PF24	Apolipoprotein L1
48.1	48.803	1287	8.83503e-10	0.00476163	2.19714	CLU	P10909-4	Clusterin
25	63.173	76	4.61247e-06	0.0137319	2.18082	C9	P02748	Complement component C9
22.4	65.163	68	0.000227017	0.00612403	2.07586	C8A	P07357	Complement component C8 alpha chain
34.9	80.118	109	0.00222635	0.00256711	2.04488	C1R	P00736	Complement C1r subcomponent
27.5	54.565	122	4.37218e-05	0.00919695	1.99354	SERPINF2	P08697	Alpha-2-antiplasmin
62.3	35.9	771	0.00282724	0.0023979	1.99218	IGHG2	P01859	Ig gamma-2 chain C region
32.7	515.6	2040	7.99859e-10	0.00484028	1.99072	APOB	P04114	Apolipoprotein B-100
39.4	52.602	430	1.95798e-05	0.00286958	1.93781	SERPINC1	P01008	Antithrombin-III
31.4	46.6	740	8.17683e-05	0.00236744	1.91146	AHSG	F5H0Q5	Alpha-2-HS-glycoprotein
97.2	11.609	1958	9.93443e-06	0.00570223	1.83887	IGKC	P01834	Ig kappa chain C region
36.1	38.999	171	0.00051368	0.00389417	1.81905	AMBP	P02760	Protein AMBP
61.6	90.568	858	0.000226084	0.00333211	1.77122	PLG	P00747	Plasminogen
47.9	54.253	466	0.000142909	0.00438115	1.7155	A1BG	P04217	Alpha-1B-glycoprotein
26.8	39.731	173	7.24583e-09	0.00421276	1.69294	PON1	P27169	Serum paraoxonase/arylesterase 1
57.6	46.496	511	0.000132723	0.00490347	1.69234	KNG1	B4DPP8	Kininogen-1
47.9	70.036	547	0.00359771	0.00551379	1.68285	F2	P00734	Prothrombin
26.8	50.598	280	4.09758e-12	0.00421848	1.66828	SERPINA3	G3V5I3	Alpha-1-antichymotrypsin
61.1	139.09	899	0.000107608	0.00272994	1.64513	CFH	P08603	Complement factor H
18.8	24.117	89	0.00295361	0.0253249	1.58881	C1QB	D6RA08	Complement C1q subcomponent subunit B
29.8	13.38	18	0.000793576	0.00581874	1.58695	IGKV4-1	P06312	Ig kappa chain V-IV region
31.4	103.36	312	5.5144e-07	0.0031637	1.58293	ITIH4	Q14624	Inter-alpha-trypsin inhibitor heavy chain H4
55	34.258	238	9.42405e-06	0.00384923	1.55347	AZGP1	P25311	Zinc-alpha-2-glycoprotein
71.4	49.496	1704	7.26255e-10	0.00399265	1.53552	FGG	P02679-2	Fibrinogen gamma chain
70.3	36.105	3200	1.14207e-05	0.00449256	1.51447	IGHG1	P01857	Ig gamma-1 chain C region
59.9	53.02	1020	0.000746793	0.00230585	1.46887	GC	D6RF35	Vitamin D-binding protein
66.6	36.154	626	1.0829e-10	0.00406288	1.44633	APOE	P02649	Apolipoprotein E
60.4	94.972	2253	5.18915e-07	0.00896059	1.44303	FGA	P02671	Fibrinogen alpha chain
39.7	122.2	713	8.53782e-06	0.00447669	1.42698	CP	P00450	Ceruloplasmin
28.7	105.21	530	0.000169978	0.00453859	1.42372	ITIH2	Q5T985	Inter-alpha-trypsin inhibitor heavy chain H2
68.1	38.298	619	0.00685878	0.004943	1.40496	APOH	P02749	Beta-2-glycoprotein 1
62.1	41.287	654	0.0351619	0.00283643	1.40054	IGHG3	P01860	Ig gamma-3 chain C region
96.2	11.293	1018	1.93e-05	0.00460664	1.39825	IGLC2	P0CG05	Ig lambda-2 chain C regions
39.3	23.511	461	0.000666608	0.00487399	1.36681	ORM1	P02763	Alpha-1-acid glycoprotein 1
64	45.205	2232	5.29711e-06	0.00366505	1.36122	HP	P00738	Haptoglobin
27.2	140.94	535	5.3578e-06	0.00482503	1.35502	CFB	B4E1Z4	Complement factor B
30	25.387	85	0.0138955	0.016225	1.35353	APCS	P02743	Serum amyloid P-component
41.1	192.84	1079	1.99155e-07	0.00295909	1.34233	C4A	B0V2C8	Complement C4-A
73.1	55.928	2000	8.51781e-06	0.00890673	1.331	FGB	P02675	Fibrinogen beta chain
64.5	51.676	901	3.2537e-06	0.00403768	1.32523	HPX	P02790	Hemopexin
25	13.227	192	6.91766e-07	0.00941229	1.30943		P01766	Ig heavy chain V-III region BRO
66.1	11.775	289	2.50219e-06	0.00473965	1.29592		P01620	Ig kappa chain V-III region SIE
72.5	77.063	4580	0.000781242	0.00311765	1.29157	TF	P02787	Serotransferrin
62.1	187.15	4062	2.00526e-09	0.010975	1.27951	C3	P01024	Complement C3
36.6	75.507	276	7.45717e-07	0.00481393	1.27659	ITIH1	B7Z549	Inter-alpha-trypsin inhibitor heavy chain H1
44.7	249.4	1425	3.52055e-06	0.00471429	1.24713	FN1	P02751-14	Fibronectin
79	30.777	1671	3.73036e-07	0.00482977	1.21619	APOA1	P02647	Apolipoprotein A-I
67.9	45.398	1222	8.30709e-08	0.00452277	1.21482	APOA4	P06727	Apolipoprotein A-IV
17.7	53.154	94	4.46173e-06	0.00515133	1.21184	AGT	P01019	Angiotensinogen
42.7	67.033	546	7.43812e-06	0.00520582	1.20934	C4BPA	P04003	C4b-binding protein alpha chain
26.1	11.612	170	5.29164e-07	0.00776265	1.19575	IGHV3-23	P01765	Ig heavy chain V-III region TIL
25.3	25.773	112	6.0452e-08	0.00538842	1.17792	C1QC	P02747	Complement C1q subcomponent subunit C
48.7	37.654	1509	2.82505e-06	0.00362246	1.17314	IGHA1	P01876	Ig alpha-1 chain C region
56.6	164.94	3299	5.34058e-07	0.00491882	1.14476	A2M	H0YGH4	Alpha-2-macroglobulin
28.7	54.305	521	1.29916e-08	0.00851441	1.11688	VTN	P04004	Vitronectin
27	11.175	340	0.00867967	0.00445339	0.966685	APOA2	P02652	Apolipoprotein A-II
37.8	11.935	114	0.000241091	0.00507586	0.901536		P80748	Ig lambda chain V-III region LOI
54.1	46.736	1060	2.23741e-09	0.0049541	0.900426	SERPINA1	P01009	Alpha-1-antitrypsin
42.1	23.063	442	0.0102904	0.0199231	0.849323	IGLL5;IGLC1	B9A064	Immunoglobulin lambda-like polypeptide 5
38.9	49.306	707	6.75914e-07	0.00534758	0.796198	IGHM	P01871	Ig mu chain C region
36.6	71.957	17	0.00221451	0.0398926	-1.28196	KNG1	P01042	Kininogen-1
30.4	51.694	33	1.37563e-06	0.0286425	-1.30365	ANGPTL6	Q8NI99	Angiopoietin-related protein 6
13.5	45.147	20	0.00527459	0.0248828	-1.45527	CFP	E9PAQ1	Properdin
24.6	64.053	37	0.000305909	0.00324064	-1.65397	F11	E9PGP2	Coagulation factor XI
4.5	251.7	18	1.62067e-05	0.0254205	-1.84395	F5	P12259	Coagulation factor V
4	100.64	14	0.000521117	0.00508471	-2.69634	GIGYF2	E9PC50	PERQ amino acid-rich with GYF domain-containing protein 2
4	24.329	25	0.00959154	0.00518279	-3.98597	TMEM198	C9JXI5	Transmembrane protein 198
Enriched
Depleted
